# Supplementary material for: The deep Earth origin of the Iceland plume and its effects on regional surface uplift and subsidence
Source: Copernicus journal article supplement (doi:10.5194/se-8-235-2017), 2017-02-23
Supplement: Supplementary file [file se-8-235-2017-supplement-title-page.pdf › se-8-235-2017-supplement-title-page.pdf]

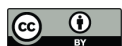

## *Supplement of*

# **The deep Earth origin of the Iceland plume and its effects on regional surface uplift and subsidence**

**Nicholas Barnett-Moore et al.**

*Correspondence to:* Nicholas Barnett-Moore ([nicholas.barnett-moore@sydney.edu.au](mailto:nicholas.barnett-moore@sydney.edu.au))

- [se-8-235-2017-supplement-title-page.pdf](#)
- [Barnett-Moore\\_etal\\_Supplementary.mp4](#)

The copyright of individual parts of the supplement might differ from the CC-BY 3.0 licence.
